# Supplementary material for: Submillimetre Network Formation by Light-induced Hybridization of Zeptomole-level DNA
Source: PubMed Central journal article supplement (PMC5137144; doi:10.1038/srep37768), 2016-12-05
Supplement: srep37768-s7.pdf [file srep37768-s7.pdf]

## SUPPLEMENTARY INFORMATION

# Submillimetre Network Formation by Light-induced Hybridization of Zeptomole-level DNA

Takuya Iida<sup>1,2\*,#</sup>, Yushi Nishimura<sup>1,2,#</sup>, Mamoru Tamura<sup>1,2</sup>, Keisuke Nishida<sup>2,3</sup>, Syoji Ito<sup>4</sup>, and Shiho Tokonami<sup>2,3,\*,#</sup>

<sup>1</sup> Department of Physical Science, Graduate School of Science, Osaka Prefecture University, Sakai, Osaka 599-8570, Japan

<sup>2</sup> Nanoscience and Nanotechnology Research Center, Osaka Prefecture University, 1-2, Gakuencho, Nakaku, Sakai, Osaka 599-8570, Japan

<sup>3</sup> Department of Applied Chemistry, Graduate School of Engineering, Osaka Prefecture University, Sakai 599-8570, Japan

<sup>4</sup> Division of Frontier Materials Science, Graduate School of Engineering Science, Osaka University, Toyonaka, Osaka 560-8531, Japan

\*Correspondence to: t-iida@p.s.osakafu-u.ac.jp (T.I.); tokonami@chem.osakafu-u.ac.jp (S.T.)

#These authors contributed equally to this work.

## Movie Legends:

Please see also the detail in the main text.

**Movie S1.** Simulation result of dynamics of probe nanoparticles (NPs) and complementary DNA under the self-consistently evaluated light-induced force (LIF) (corresponding to Figure 2b in the main text).

**Movie S2.** Simulation result of dynamics of probe NPs and mismatched DNA under the self-consistently evaluated LIF (corresponding to Figure 2c in the main text).

**Movie S3.** Real-time dynamics of probe NPs and complementary DNA (AAAA; 100 pM) under laser irradiation. Recording started at the same time as laser irradiation (corresponding to Figure 3a in the main text and Figure S1a).

**Movie S4.** Real-time dynamics of probe NPs and half-mismatched DNA (AATT; 100 pM) under laser irradiation. Recording started at the same time as laser irradiation (corresponding to Figure S1b).

**Movie S5.** Real-time dynamics of probe NPs and alternate-sequence DNA (TATA; 100 pM) under laser irradiation. Recording started at the same time as laser irradiation (corresponding to Figure S1c).

**Movie S6.** Real-time dynamics of probe NPs and mismatched DNA (TTTT; 100 pM) under laser irradiation. Recording started at the same time as laser irradiation (corresponding to Figure 3a in the main text and Figure S1d).

Supplementary Figures:

Optical transmission image after 30 s laser irradiation

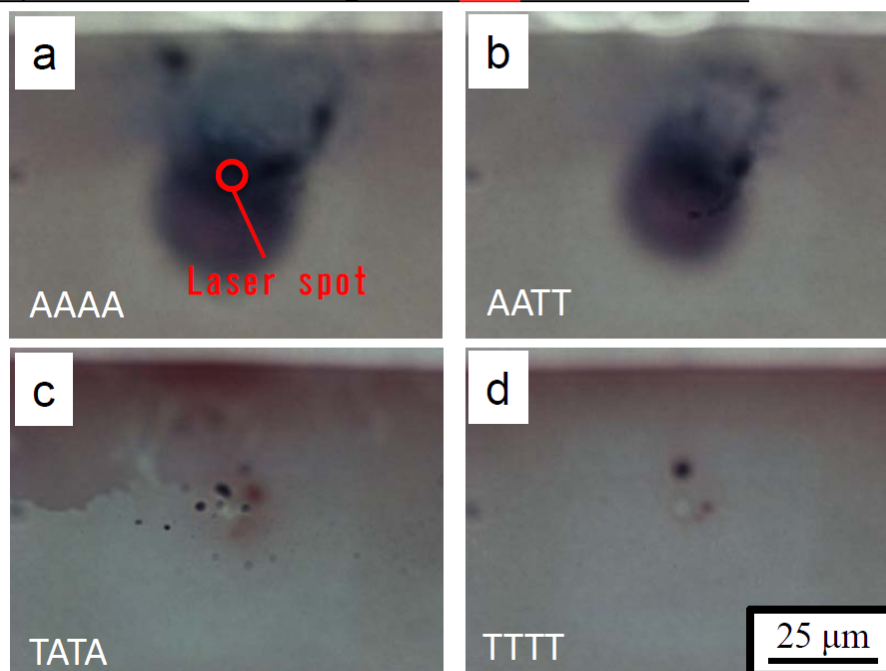

**Fig. S1. a – d,** Optical transmission images at 30 s after laser irradiation for each sequence of target DNA and T-sequence probe NPs. Laser wavelength is 1064 nm, and input power 0.2 W at the laser source.

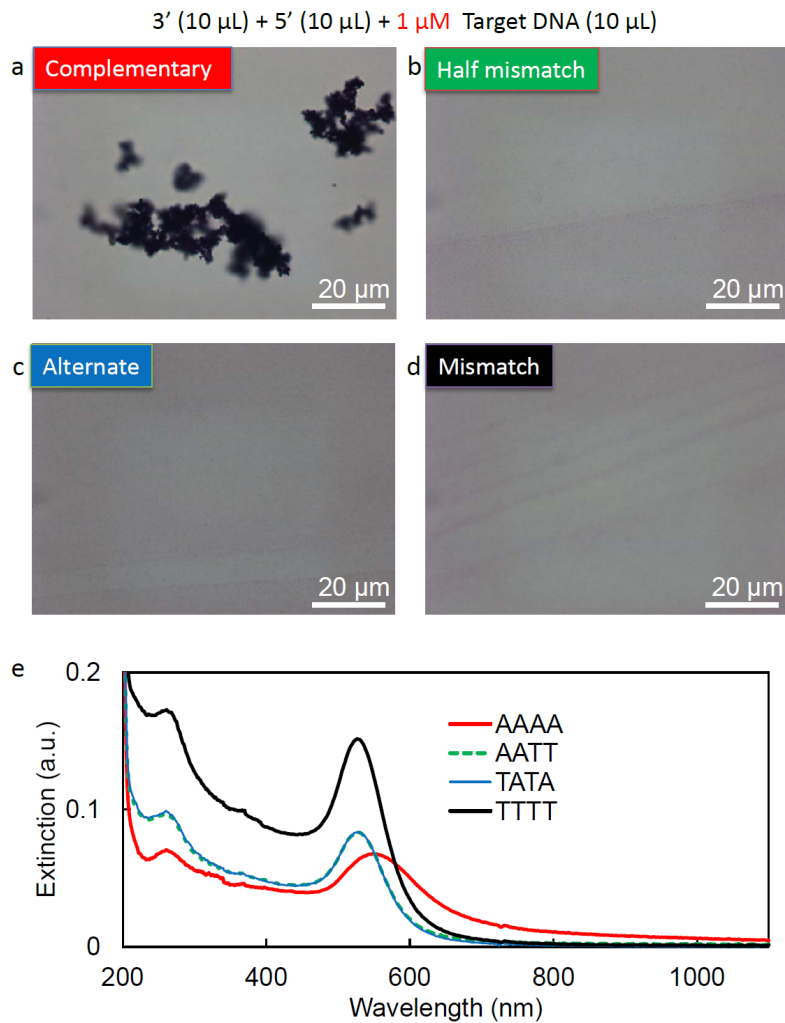

**Fig. S2. a-d,** Optical transmission images on the glass substrate of probe NPs 3 h after adding target DNA (1  $\mu$ M). **e,** Extinction spectra of probe NPs in suspension after adding target DNA, observed by UV-vis spectrometry in bulk suspension.

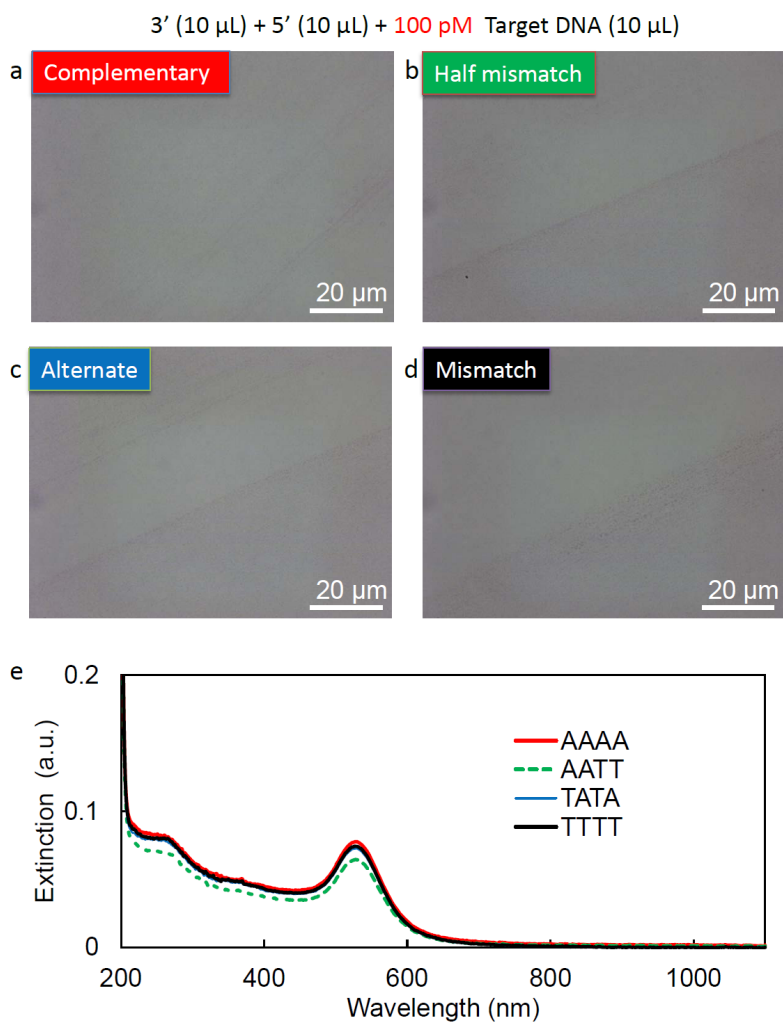

**Fig. S3. a-d,** Optical transmission images of probe NPs on the glass substrate 3 h after adding target DNA (100 pM). **e,** Extinction spectra of probe NPs in suspension after adding target DNA.

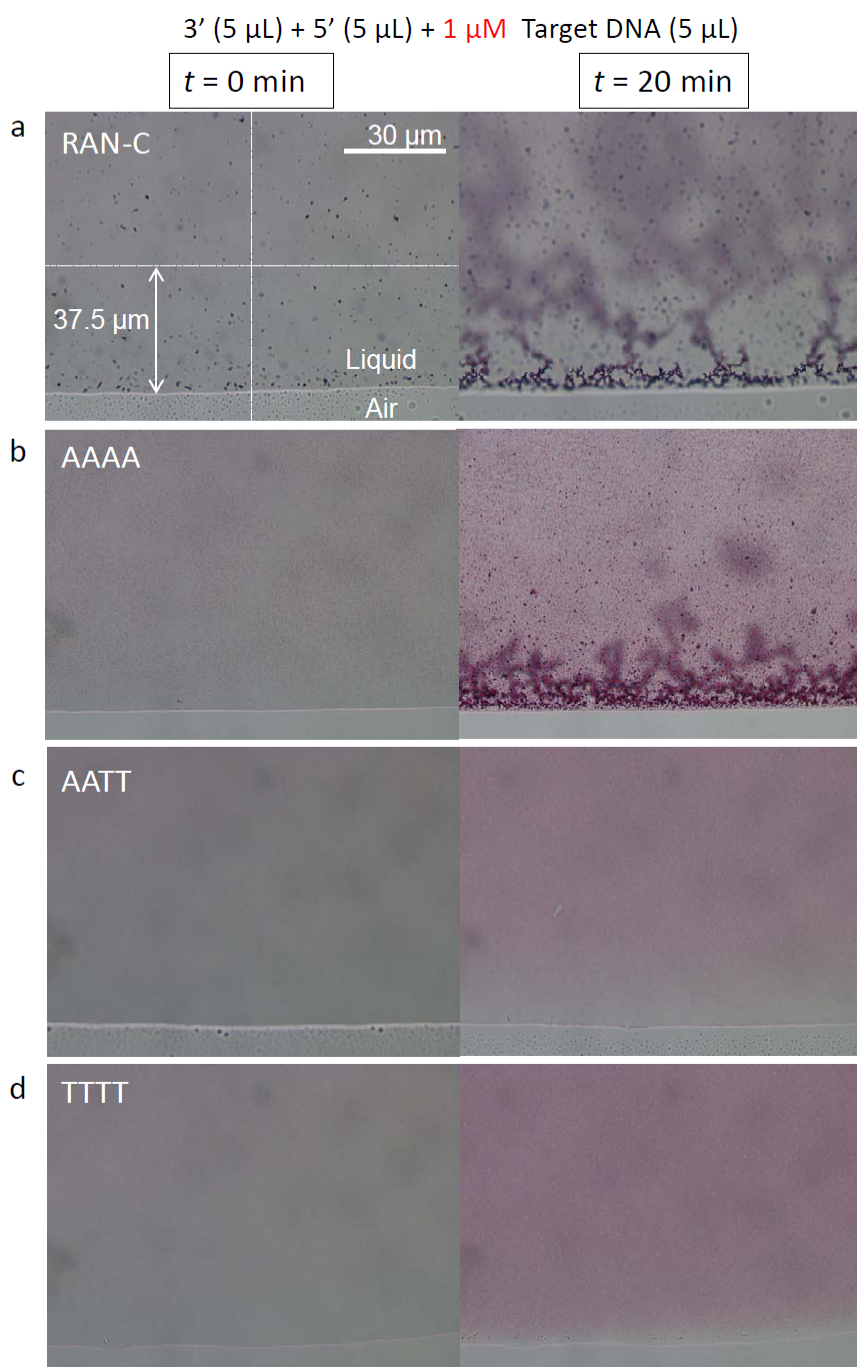

**Fig. S4. a-d,** Optical transmission images of dispersed liquid droplets of probe NPs near the air-liquid interface on the glass substrate 20 minutes after adding different target DNA (1  $\mu$ M).

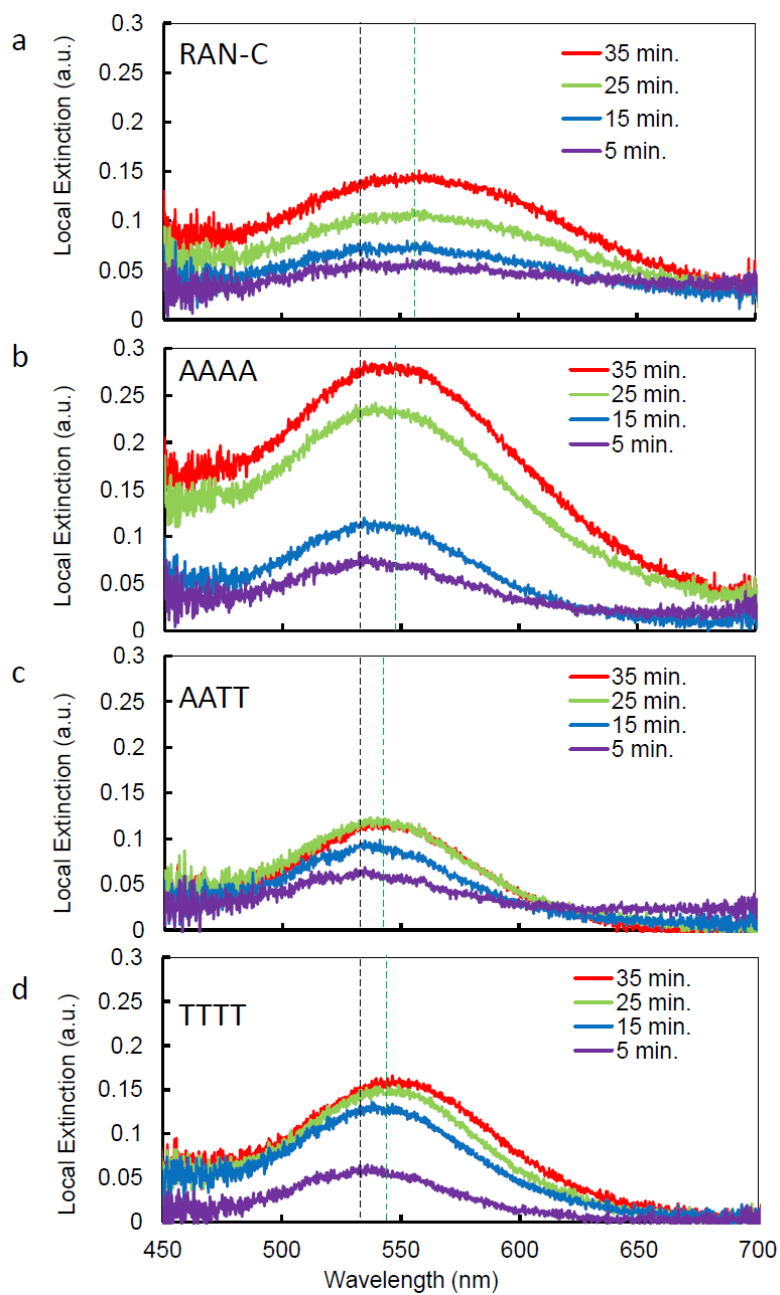

**Fig. S5. a-d**, Local extinction spectra of dispersed liquid droplets of probe NPs near the air-liquid interface after adding different target DNA ( $1 \mu\text{M}$ ), which corresponds to Fig. S4.

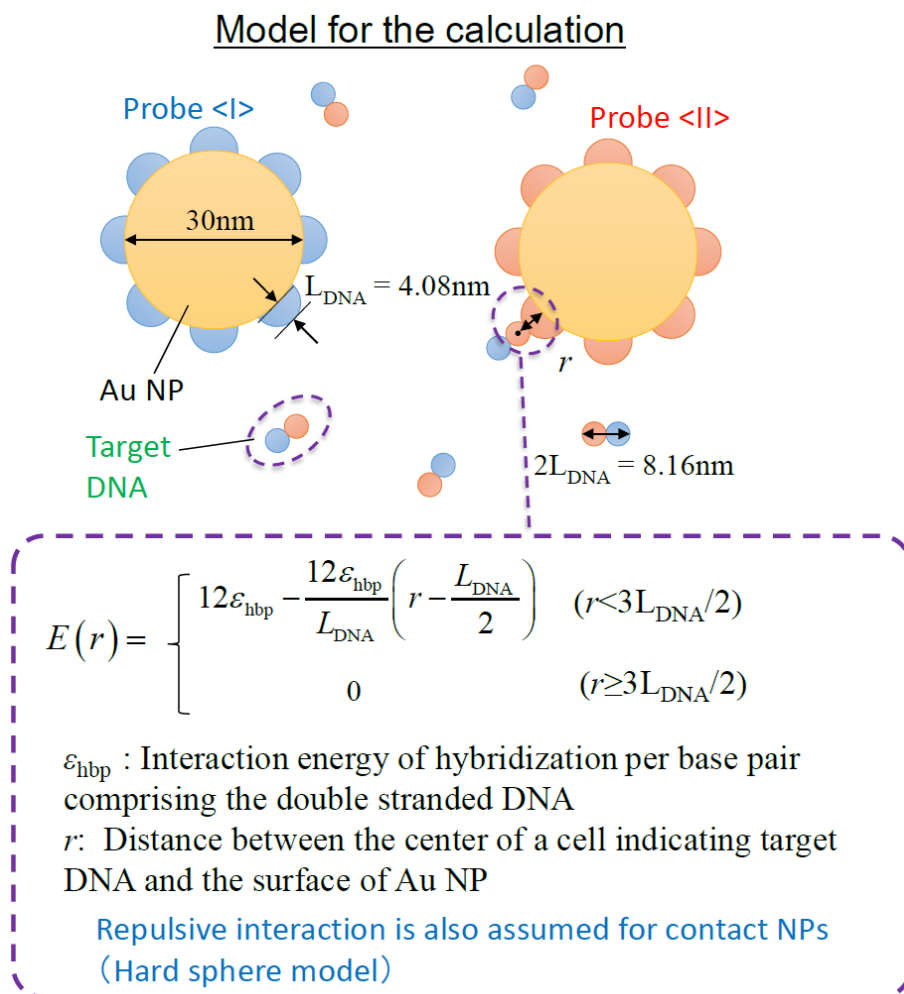

**Fig. S6.** Model for the calculation of optically accelerated hybridization of DNA on AuNPs.

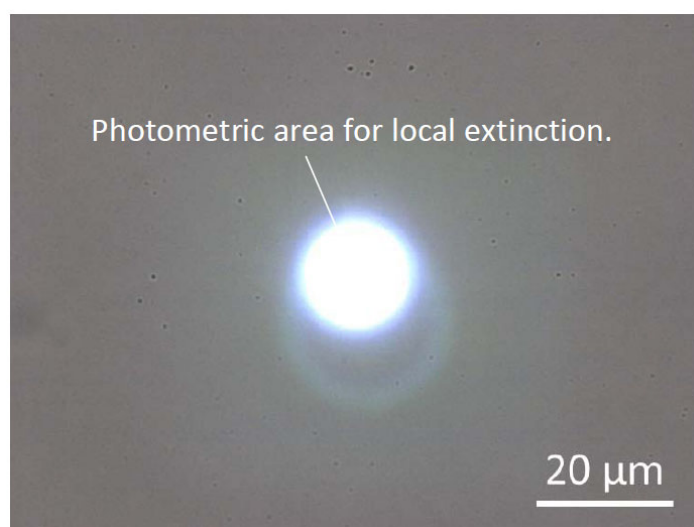

**Fig. S7.** Photometric area for the observation of local extinction spectra.
